# Supplementary material for: Blending PHBV with P(3HB- co -4HB) for superior thermal stability, mechanical strength, and environmental degradation
Source: Royal Society of Chemistry journal article supplement (doi:10.1039/d5fd00035a), 2025-04-16
Supplement: d5fd00035a1.pdf [file d5fd00035a1.pdf]

## Blending PHBV with P(3HB-co-4HB) for Superior Thermal Stability, Mechanical Strength, and Environmental Degradation

Ana Carolina Lemos de Morais,<sup>a,b</sup> Allef Gabriel Fortes da Silva,<sup>b</sup> Iago Rodrigues de Abreu,<sup>b</sup> Corinne van Noordenne-Bos,<sup>b</sup> Vincent S. D. Voet,<sup>b</sup> Rudy Folkersma,<sup>b</sup> Katja Loos<sup>a,\*</sup>

### Supplementary information

**Table S1.** Mechanical properties of PHBV, PX, and their blends produced by extrusion.

|           | Tensile Strain (MPa)     | Young's Modulus (MPa)     | Elongation at break (%)  | Impact resistance (KJ/m <sup>2</sup> ) | Types of impact failure |
|-----------|--------------------------|---------------------------|--------------------------|----------------------------------------|-------------------------|
| PX        | 16 (±0.1) <sup>a</sup>   | 590 (±30.2) <sup>g</sup>  | 20.0 (±2.1) <sup>a</sup> | 106.4 (±9.2) <sup>a</sup>              | Complete fracture       |
| PHBV      | 42.9 (±0.2) <sup>b</sup> | 4670 (±115) <sup>a</sup>  | 1.2(±0.0) <sup>b</sup>   | 5.4(±0.1) <sup>d</sup>                 | Complete fracture       |
| PHBV_10PX | 39.3 (±0.4) <sup>c</sup> | 4230 (±28.6) <sup>b</sup> | 1.5 (±0.0) <sup>b</sup>  | 5.9(±0.1) <sup>d</sup>                 | Complete fracture       |
| PHBV_20PX | 36.3 (±0.4) <sup>d</sup> | 3460 (±38.3) <sup>c</sup> | 1.8 (±0.0) <sup>b</sup>  | 6.2(±0.1) <sup>d</sup>                 | Complete fracture       |
| PHBV_30PX | 34.7 (±0.4) <sup>e</sup> | 2990 (±14.8) <sup>d</sup> | 2.4 (±0.1) <sup>b</sup>  | 7.5(±0.1) <sup>d</sup>                 | Complete fracture       |
| PHBV_40PX | 31.5 (±0.1) <sup>f</sup> | 2580 (±15.1) <sup>e</sup> | 3.2 (±0.1) <sup>b</sup>  | 13.9(±1.0) <sup>c</sup>                | Complete fracture       |
| PHBV_50PX | 28.6 (±0.1) <sup>g</sup> | 2200 (±23.4) <sup>f</sup> | 3.9 (±0.1) <sup>b</sup>  | 25.4(±0.6) <sup>b</sup>                | Complete fracture       |

a, b, c, d, f, g Different letters indicate a group of significant differences ( $p > 0.05$ ) between the means according to Tukey's test.

**Table S2.** Values for weight loss (%) over time for PHBV, PX, and their blends for soil degradation.

| Time    | PHBV        | PX         | PHBV_10PX  | PHBV_20PX  | PHBV_30PX  | PHBV_40PX  | PHBV_50PX  |
|---------|-------------|------------|------------|------------|------------|------------|------------|
| 1 WEEK  | 0.5% ± 0.07 | 0.9% ± 0.2 | 0.1% ± 0.1 | 0.4% ± 0.1 | 0.7% ± 0.4 | 0.8% ± 0.3 | 0.5% ± 0.3 |
| 2 WEEK  | 6.8% ± 0.9  | 13% ± 1.6  | 3% ± 0.5   | 3% ± 0.3   | 6% ± 1.3   | 8% ± 1.3   | 8% ± 0.7   |
| 4 WEEK  | 24% ± 6.1   | 40% ± 4.6  | 15% ± 1.3  | 17% ± 4    | 18% ± 1.6  | 31% ± 5    | 28% ± 5.6  |
| 6 WEEK  | 36% ± 8     | 40% ± 9.3  | 26% ± 3.4  | 26% ± 4    | 33% ± 4.8  | 45% ± 5.4  | 44% ± 3.2  |
| 8 WEEK  | 49% ± 13    | 89% ± 2    | 32% ± 8.9  | 44% ± 7    | 46% ± 2.8  | 52% ± 7.6  | 57% ± 10.4 |
| 10 WEEK | 63% ± 9.4   | 98% ± 0.4  | 34% ± 4.5  | 57% ± 10   | 55% ± 7.3  | 63% ± 7.8  | 60% ± 2.4  |
| 12 WEEK | 75% ± 7.3   | 100%       | 62% ± 2.3  | 59% ± 7    | 83% ± 6    | 75% ± 6    | 80% ± 8.1  |
| 14 WEEK | 95% ± 2.7   | 100%       | 67% ± 5.4  | 90% ± 3    | 84% ± 5.   | 89% ± 11   | 97% ± 3    |
| 16 WEEK | 96% ± 1     | 100%       | 83% ± 8    | 77% ± 5    | 69% ± 13   | 83% ± 9    | 97% ± 5.4  |
